# Supplementary material for: Effects of 3‐HAA on HCC by Regulating the Heterogeneous Macrophages—A scRNA‐Seq Analysis
Source: PubMed Central journal article supplement (PMC10238176; doi:10.1002/advs.202207074), 2023-04-04
Supplement: ADVS-10-2207074-s001.pdf [file ADVS-10-2207074-s001.pdf]

## Supporting Information

for *Adv. Sci.*, DOI 10.1002/adv.202207074

Effects of 3-HAA on HCC by Regulating the Heterogeneous Macrophages—A scRNA-Seq Analysis

*Chen Xue, Xinyu Gu, Qiuxian Zheng, Qingmiao Shi, Xin Yuan, Qingfei Chu, Junjun Jia, Yuanshuai Su, Zhengyi Bao, Juan Lu\* and Lanjuan Li\**

## Supporting information

### Effects of 3-HAA on HCC by regulating the heterogeneous macrophages—A scRNA-seq analysis

Chen Xue<sup>1†</sup>, Xinyu Gu<sup>1†</sup>, Qiuxian Zheng<sup>1†</sup>, Qingmiao Shi<sup>1†</sup>, Xin Yuan<sup>1</sup>, Qingfei Chu<sup>1</sup>, Junjun Jia<sup>2</sup>, Yuanshuai Su<sup>1</sup>, Zhengyi Bao<sup>1</sup>, Juan Lu<sup>1\*</sup>, Lanjuan Li<sup>1\*</sup>

<sup>1</sup> State Key Laboratory for Diagnosis and Treatment of Infectious Diseases, National Clinical Research Center for Infectious Diseases, National Medical Center for Infectious Diseases, Collaborative Innovation Center for Diagnosis and Treatment of Infectious Diseases, The First Affiliated Hospital, Zhejiang University School of Medicine, Hangzhou, 310003, China.

<sup>2</sup> Division of Hepatobiliary and Pancreatic Surgery, Department of Surgery, The First Affiliated Hospital, Zhejiang University School of Medicine, Hangzhou, 310003, China.

<sup>†</sup>These authors contributed equally

#### **\*Corresponding author: Lanjuan Li & Juan Lu**

State Key Laboratory for Diagnosis and Treatment of Infectious Diseases, The First Affiliated Hospital, Zhejiang University School of Medicine, No. 79 Qingchun Road, Shangcheng District, Hangzhou, Zhejiang 310003, China. Tel: +86-0571-87236459; Email: ljli@zju.edu.cn (Lanjuan Li), lujuanzju@zju.edu.cn (Juan Lu).

## **Supplementary figures and tables**

### **1. Supplementary figures S1-3**

|                         |   |
|-------------------------|---|
| Supplementary figure S1 | 3 |
| Supplementary figure S2 | 4 |
| Supplementary figure S3 | 5 |

### **2. Supplementary tables S1-4**

|                        |    |
|------------------------|----|
| Supplementary table S1 | 6  |
| Supplementary table S2 | 8  |
| Supplementary table S3 | 9  |
| Supplementary table S4 | 10 |

## Supplementary Figures

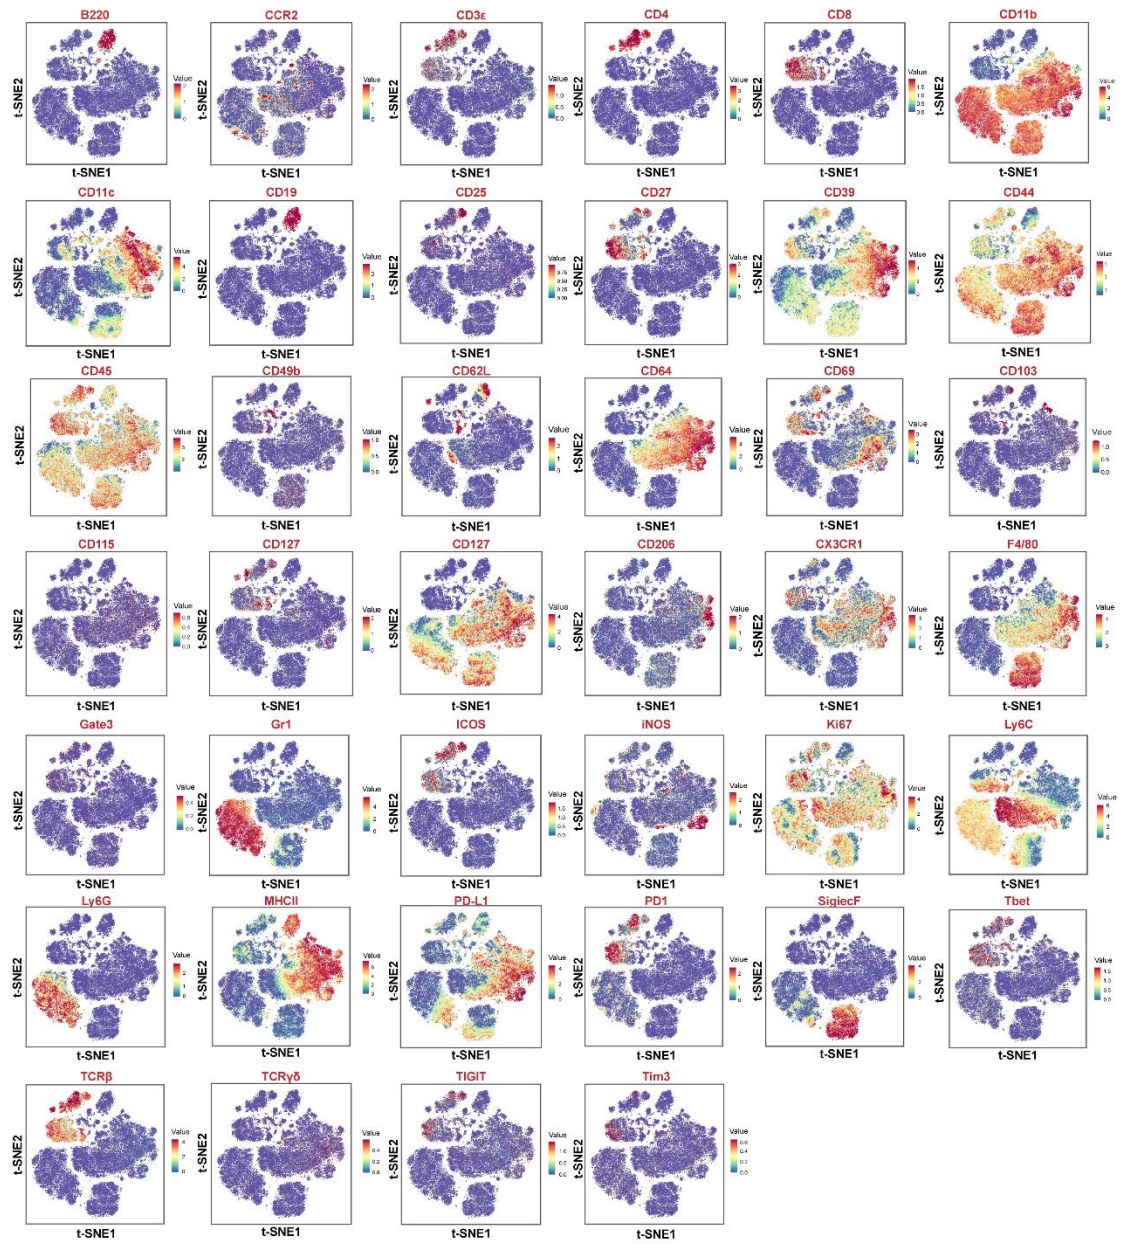

Figure S1. t-SNE maps of 40 selected panel markers.

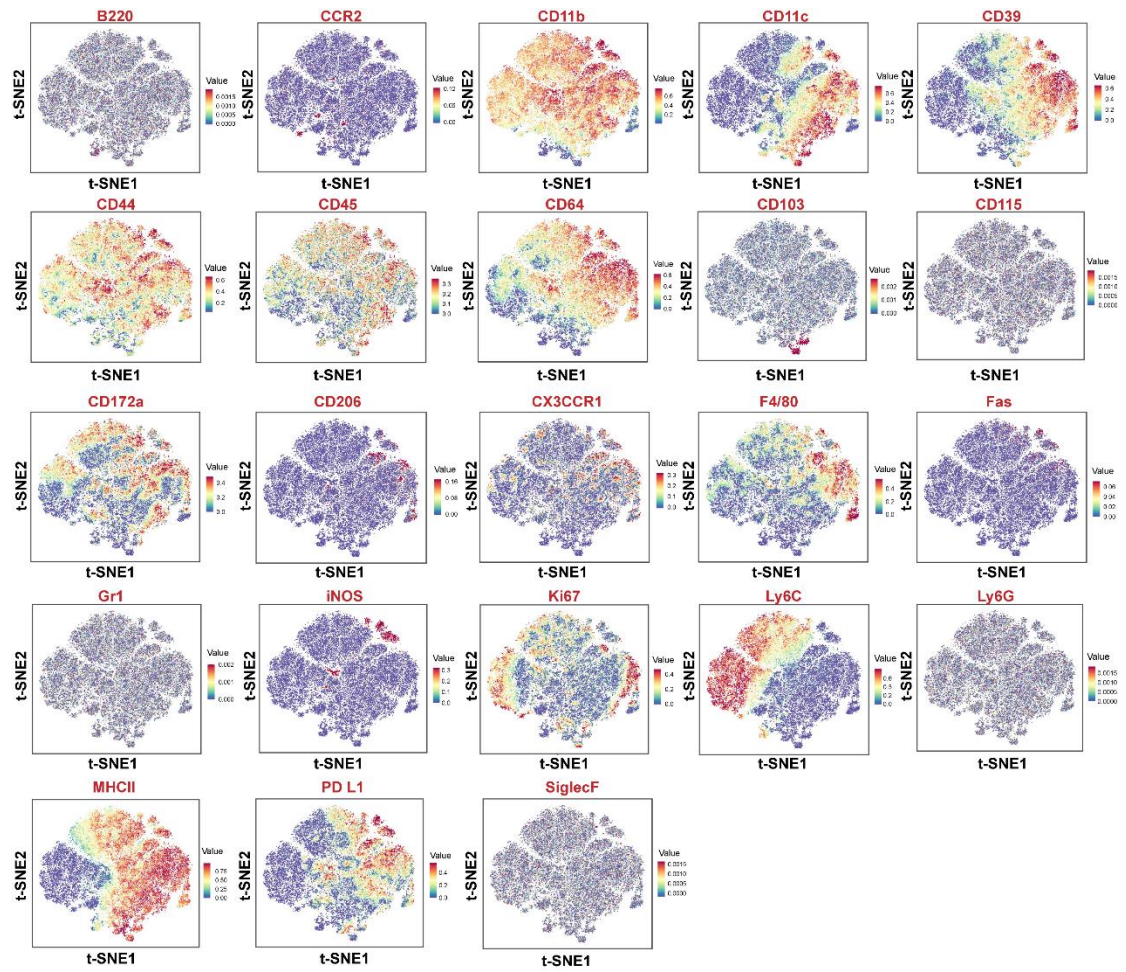

**Figure S2. t-SNE maps of 23 special markers representing myeloid populations.**

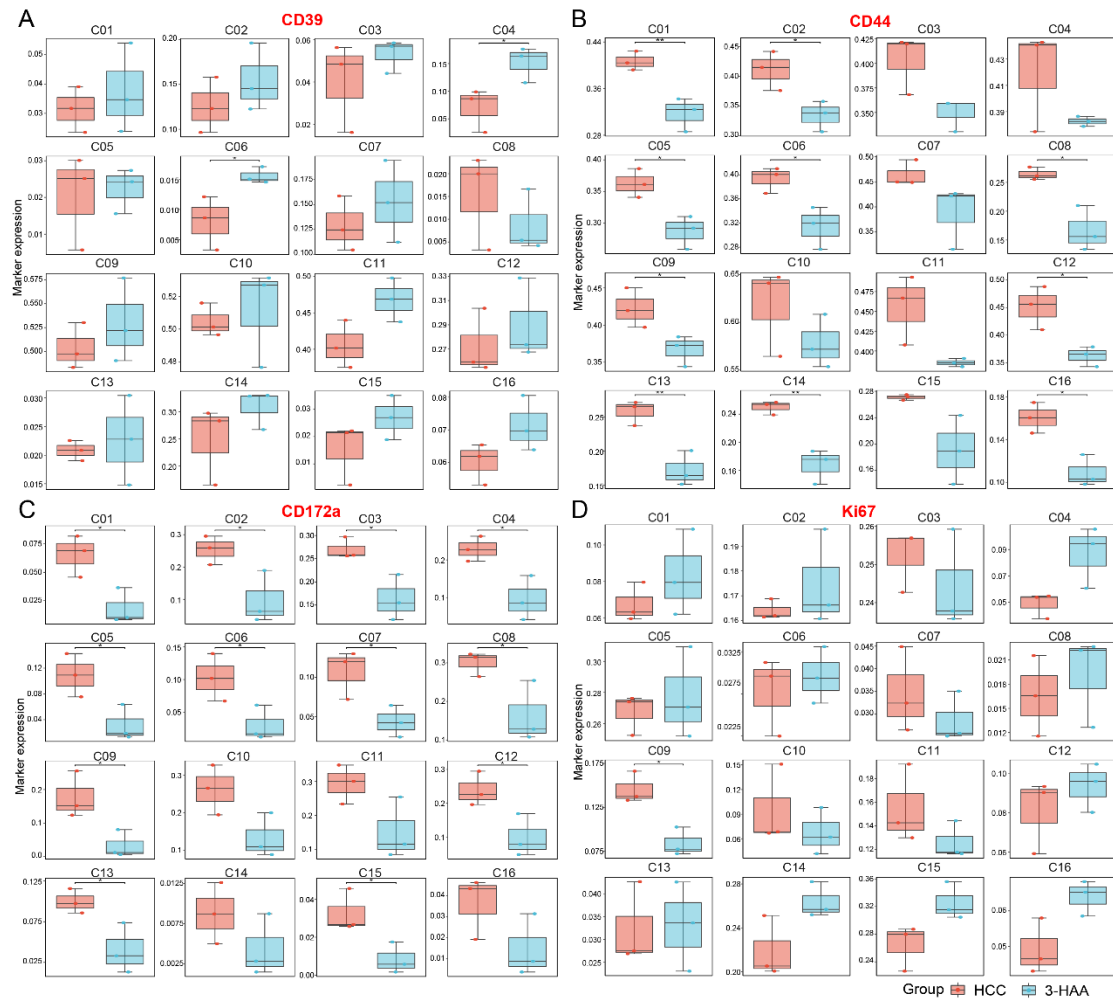

**Figure S3. Bar plots of differently expressed functional markers in myeloid populations.**

**Table S1. The details of all immune cell clusters, cell types, and subtypes were analyzed by CyTOF**

| Cell types            | Clusters | Marker expression                                                                                                                                                                                                                |
|-----------------------|----------|----------------------------------------------------------------------------------------------------------------------------------------------------------------------------------------------------------------------------------|
| CD4 <sup>+</sup> TN   | C01      | CD3e <sup>+</sup> TCRβ <sup>+</sup> CD27 <sup>+</sup> CD62L <sup>+</sup> CD127 <sup>+</sup> CD4 <sup>+</sup>                                                                                                                     |
| CD8 <sup>+</sup> TN   | C02      | CD103 <sup>+</sup> TCRβ <sup>+</sup> CD27 <sup>+</sup> CD62L <sup>+</sup> CD127 <sup>+</sup> CD8 <sup>+</sup>                                                                                                                    |
| CD4 <sup>+</sup> TE   | C03      | TCRβ <sup>+</sup> CD127 <sup>+</sup> CD4 <sup>+</sup>                                                                                                                                                                            |
| CD4 <sup>+</sup> Treg | C04      | CD3e <sup>+</sup> ICOS <sup>+</sup> Ki67 <sup>+</sup> CD39 <sup>+</sup> TIGIT <sup>+</sup> TCRβ <sup>+</sup> CD69 <sup>+</sup> CD25 <sup>+</sup> CD27 <sup>+</sup> MHCII <sup>+</sup> CD4 <sup>+</sup>                           |
| CD4 <sup>+</sup> TE   | C05      | CD3e <sup>+</sup> PD1 <sup>+</sup> CX3CR1 <sup>+</sup> ICOS <sup>+</sup> Ki67 <sup>+</sup> CD39 <sup>+</sup> TIGIT <sup>+</sup> TCRβ <sup>+</sup> CD69 <sup>+</sup> CD27 <sup>+</sup> MHCII <sup>+</sup> CD4 <sup>+</sup>        |
| CD4 <sup>+</sup> TE   | C06      | PD1 <sup>+</sup> ICOS <sup>+</sup> CD39 <sup>+</sup> TCRβ <sup>+</sup> CD69 <sup>+</sup> CD4 <sup>+</sup>                                                                                                                        |
| B cells               | C07      | CD19 <sup>+</sup> B220 <sup>+</sup> CD62L <sup>+</sup> MHCII <sup>+</sup>                                                                                                                                                        |
| B cells               | C08      | CD19 <sup>+</sup> B220 <sup>+</sup> MHCII <sup>+</sup>                                                                                                                                                                           |
| B cells               | C09      | CD19 <sup>+</sup> B220 <sup>+</sup> MHCII <sup>+</sup>                                                                                                                                                                           |
| DC                    | C10      | Ki67 <sup>+</sup> CD103 <sup>+</sup> CD39 <sup>+</sup> CD11c <sup>+</sup> PD-L1 <sup>+</sup> MHCII <sup>+</sup>                                                                                                                  |
| B cells               | C11      | Ly6C <sup>+</sup> Fas <sup>+</sup> Ki67 <sup>+</sup> CD39 <sup>+</sup> TIGIT <sup>+</sup> CD69 <sup>+</sup> PD-L1 <sup>+</sup> MHCII <sup>+</sup> CD11b <sup>+</sup>                                                             |
| Macrophage            | C12      | CX3CR1 <sup>+</sup> CD39 <sup>+</sup> F4/80 <sup>+</sup> CD64 <sup>+</sup> CD206 <sup>+</sup> PD-L1 <sup>+</sup> MHCII <sup>+</sup> CD11b <sup>+</sup>                                                                           |
| Macrophage            | C13      | Fas <sup>+</sup> CX3CR1 <sup>+</sup> CD39 <sup>+</sup> F4/80 <sup>+</sup> iNOS <sup>+</sup> CD11c <sup>+</sup> CD64 <sup>+</sup> PD-L1 <sup>+</sup> CD172a <sup>+</sup> MHCII <sup>+</sup> CD11b <sup>+</sup>                    |
| Macrophage            | C14      | Ly6C <sup>+</sup> CX3CR1 <sup>+</sup> Ki67 <sup>+</sup> CD39 <sup>+</sup> F4/80 <sup>+</sup> CD69 <sup>+</sup> CD11c <sup>+</sup> CD64 <sup>+</sup> PD-L1 <sup>+</sup> CD172a <sup>+</sup> MHCII <sup>+</sup> CD11b <sup>+</sup> |
| NK                    | C15      | CD49b <sup>+</sup> Ki67 <sup>+</sup> PD-L1 <sup>+</sup> CD11b <sup>+</sup>                                                                                                                                                       |

| Cell types          | Clusters | Marker expression                                                                                                                                                                           |
|---------------------|----------|---------------------------------------------------------------------------------------------------------------------------------------------------------------------------------------------|
| NK                  | C16      | CD49b <sup>+</sup> CD69 <sup>+</sup> CD11c <sup>+</sup> CD27 <sup>+</sup> CD62L <sup>+</sup> CD11b <sup>+</sup>                                                                             |
| Others              | C17      | Ly6C <sup>+</sup> Ki67 <sup>+</sup> PD-L1 <sup>+</sup>                                                                                                                                      |
| Neutrophils         | C18      | Ly6C <sup>+</sup> Gr1 <sup>+</sup> Ly6G <sup>+</sup> Ki67 <sup>+</sup> CD39 <sup>+</sup> CD172a <sup>+</sup> CD11b <sup>+</sup>                                                             |
| Eosinophils         | C19      | Ly6C <sup>+</sup> Ki67 <sup>+</sup> CD39 <sup>+</sup> F4/80 <sup>+</sup> CD172a <sup>+</sup> SiglecF <sup>+</sup> CD11b <sup>+</sup>                                                        |
| Eosinophils         | C20      | CD39 <sup>+</sup> F4/80 <sup>+</sup> CD11c <sup>+</sup> PD-L1 <sup>+</sup> CD172a <sup>+</sup> SiglecF <sup>+</sup> CD11b <sup>+</sup>                                                      |
| Eosinophils         | C21      | Ly6C <sup>+</sup> CD39 <sup>+</sup> F4/80 <sup>+</sup> CD11c <sup>+</sup> PD-L1 <sup>+</sup> CD172a <sup>+</sup> SiglecF <sup>+</sup> CD11b <sup>+</sup>                                    |
| Macrophage          | C22      | Ly6C <sup>+</sup> CX3CR1 <sup>+</sup> Ki67 <sup>+</sup> CD39 <sup>+</sup> F4/80 <sup>+</sup> CD64 <sup>+</sup> CD172a <sup>+</sup> MHCI I <sup>+</sup> CD11b <sup>+</sup>                   |
| Macrophage          | C23      | Ly6C <sup>+</sup> F4/80 <sup>+</sup> CD64 <sup>+</sup> CD172a <sup>+</sup> CD11b <sup>+</sup>                                                                                               |
| Macrophage          | C24      | Ly6C <sup>+</sup> CX3CR1 <sup>+</sup> F4/80 <sup>+</sup> CD64 <sup>+</sup> CD172a <sup>+</sup> CD11b <sup>+</sup>                                                                           |
| NK                  | C25      | CD39 <sup>+</sup> CD69 <sup>+</sup> CD11c <sup>+</sup>                                                                                                                                      |
| NK                  | C26      | Ly6C <sup>+</sup> Tbet <sup>+</sup> CX3CR1 <sup>+</sup> CD49b <sup>+</sup> CD11c <sup>+</sup> CD11b <sup>+</sup>                                                                            |
| pDC                 | C27      | Ly6C <sup>+</sup> CD39 <sup>+</sup> B220 <sup>+</sup> CD11c <sup>+</sup> CD172a <sup>+</sup> MHCII <sup>+</sup> CD4 <sup>+</sup>                                                            |
| Others              | C28      | Ly6C <sup>+</sup> Ki67 <sup>+</sup> CD11c <sup>+</sup>                                                                                                                                      |
| $\gamma\delta$ T    | C29      | Ly6C <sup>+</sup> TCR $\gamma\delta$ <sup>+</sup> CD27 <sup>+</sup> CD62L <sup>+</sup> CD127 <sup>+</sup>                                                                                   |
| CD8 <sup>+</sup> T  | C30      | Ly6C <sup>+</sup> TCR $\beta$ <sup>+</sup> CD27 <sup>+</sup> CD62L <sup>+</sup> CD127 <sup>+</sup>                                                                                          |
| CD8 <sup>+</sup> TN | C31      | Ly6C <sup>+</sup> PD1 <sup>+</sup> CX3CR1 <sup>+</sup> Ki67 <sup>+</sup> CD39 <sup>+</sup> TCR $\beta$ <sup>+</sup> CD69 <sup>+</sup> CD27 <sup>+</sup> MHCII <sup>+</sup> CD8 <sup>+</sup> |
| CD8 <sup>+</sup> TN | C32      | Ly6C <sup>+</sup> CD39 <sup>+</sup> TCR $\beta$ <sup>+</sup> CD69 <sup>+</sup> CD11c <sup>+</sup>                                                                                           |



**Table S2. The details of all myeloid cell clusters, cell types, and subtypes were analyzed by CyTOF**

| Cell types | Subtypes | Clusters | Marker expression                                                                                                                 |
|------------|----------|----------|-----------------------------------------------------------------------------------------------------------------------------------|
| macrophage |          | C01      | Ly6C <sup>+</sup> MHCII <sup>+</sup> CD11b <sup>+</sup> CD44 <sup>+</sup>                                                         |
| macrophage |          | C02      | Ly6C <sup>+</sup> MHCII <sup>+</sup> CD11b <sup>+</sup> CD64 <sup>+</sup> CD44 <sup>+</sup>                                       |
| macrophage |          | C03      | Ly6C <sup>+</sup> MHCII-Ki67 <sup>+</sup> CD11b <sup>+</sup> CD64 <sup>+</sup> CD172a <sup>+</sup> CD44 <sup>+</sup>              |
| macrophage |          | C04      | Ly6C <sup>+</sup> MHCII-Ki67 <sup>-</sup> CD11b <sup>+</sup> CD64 <sup>+</sup> CD172a <sup>+</sup> CD44 <sup>+</sup>              |
| macrophage |          | C05      | Ly6C <sup>+</sup> MHCII-Ki67 <sup>+</sup> CD11b <sup>+</sup> CD44 <sup>+</sup>                                                    |
| macrophage |          | C06      | Ly6C <sup>+</sup> MHCII-CD11b <sup>+</sup> CD44 <sup>+</sup>                                                                      |
| macrophage |          | C07      | CD11b <sup>+</sup> CD64 <sup>+</sup> CD44 <sup>+</sup>                                                                            |
| macrophage |          | C08      | CD11c <sup>+</sup> CD11b <sup>+</sup> CD172a <sup>+</sup>                                                                         |
| macrophage | M2       | C09      | F4/80 <sup>+</sup> CD64 <sup>+</sup> CD39 <sup>+</sup> CD44 <sup>+</sup>                                                          |
| macrophage | M1       | C10      | F4/80 <sup>+</sup> CD64 <sup>+</sup> CD39 <sup>+</sup> CD44 <sup>+</sup> CD11b <sup>+</sup> iNOS <sup>+</sup> PD-L1 <sup>+</sup>  |
| macrophage |          | C11      | F4/80 <sup>+</sup> CD64 <sup>+</sup> CD39 <sup>+</sup> CD44 <sup>+</sup> CD11b <sup>+</sup> CD11c <sup>+</sup> PD-L1 <sup>+</sup> |
| macrophage |          | C12      | CD64 <sup>+</sup> CD39 <sup>+</sup> CD44 <sup>+</sup> CD11b <sup>+</sup> CD11c <sup>+</sup>                                       |
| pDC        |          | C13      | CD11c <sup>+</sup> MHCII <sup>+</sup> Ly6C <sup>+</sup>                                                                           |
| cDC        |          | C14      | CD11c <sup>+</sup> MHCII <sup>+</sup> Ki67 <sup>+</sup> CD39 <sup>+</sup> CD103 <sup>+</sup>                                      |
| cDC        |          | C15      | CD11c <sup>+</sup> MHCII <sup>+</sup> Ki67 <sup>+</sup>                                                                           |
| cDC        |          | C16      | CD11c <sup>+</sup> MHCII <sup>+</sup> PD-L1 <sup>+</sup>                                                                          |

**Table S3. The details of all myeloid cell clusters, cell types, and subtypes were analyzed by scRNA-seq**

| <b>Clusters</b> | <b>Cell types</b>         | <b>Subtypes</b>                        | <b>Key Marker</b>                                                         |
|-----------------|---------------------------|----------------------------------------|---------------------------------------------------------------------------|
| Cluster0        | M2-Macrophages            | Fn1 <sup>+</sup> M2                    | Arg1 <sup>+</sup> Cd14 <sup>+</sup> Lyz2 <sup>+</sup>                     |
| Cluster01       | M1-Macrophages            | Cxcl9 <sup>+</sup> M1                  | H2-Dmb1 <sup>+</sup> Lyz2 <sup>+</sup>                                    |
| Cluster02       | M2-Macrophages            | Arg1 <sup>+</sup> M2                   | Arg1 <sup>+</sup> Lyz2 <sup>+</sup>                                       |
| Cluster03       | Monocytes                 | Chil3 <sup>+</sup> Monocytes           | Chil3 <sup>+</sup> Ly6c2 <sup>+</sup> Lyz2 <sup>+</sup>                   |
| Cluster04       | Resident Macrophages      | CD81 <sup>+</sup> Macrophages          | Cd81 <sup>+</sup> C1qa <sup>+</sup> Lyz2 <sup>+</sup>                     |
| Cluster05       | cDC                       | CD209a <sup>+</sup> DC                 | Cd209a <sup>+</sup> H2-Aa <sup>+</sup> Clec10a <sup>+</sup>               |
| Cluster06       | Macrophages               | Ace <sup>+</sup> Macrophages           | Cd300a <sup>+</sup> Lyz2 <sup>+</sup>                                     |
| Cluster07       | Proliferating Macrophages | Mki67 <sup>+</sup> Macrophages         | Mki67 <sup>+</sup> Lyz2 <sup>+</sup>                                      |
| Cluster08       | Migratory cDC             | Ccr7 <sup>+</sup> Ccl5 <sup>+</sup> DC | Ccr7 <sup>+</sup> Ccl5 <sup>+</sup> Tbc1d4 <sup>+</sup> Cst3 <sup>+</sup> |
| Cluster09       | Monocytes                 | Ace <sup>+</sup> Monocytes             | Ace <sup>+</sup> Ly6c2 <sup>+</sup>                                       |
| Cluster10       | Kuffer cells              | Clec4f <sup>+</sup> Kuffer cells       | Clec4f <sup>+</sup>                                                       |
| Cluster11       | pDC                       | Siglech <sup>+</sup> pDC               | Siglecf <sup>+</sup>                                                      |
| Cluster12       | Proliferating Macrophages | Mcm3 <sup>+</sup> Macrophages          | Mcm3 <sup>+</sup> Mcm6 <sup>+</sup> C1qa <sup>+</sup>                     |
| Cluster13       | cDC                       | Xcr1 <sup>+</sup> cDC                  | Xcr1 <sup>+</sup> Cst3 <sup>+</sup> Clec9a <sup>+</sup>                   |
| Cluster14       | M2-Macrophages            | Arg1 <sup>+</sup> Saa3 <sup>+</sup> M2 | Arg1 <sup>+</sup> C1qa <sup>+</sup>                                       |
| Cluster15       | Proliferating cDC         | Mcm3 <sup>+</sup> cDC                  | Mcm3 <sup>+</sup> Mcm6 <sup>+</sup> CST3 <sup>+</sup>                     |
| Cluster16       | pDC                       | CD209d <sup>+</sup> pDC                | Cd209d <sup>+</sup> Cd209a <sup>+</sup> Siglech <sup>+</sup>              |

**Table S4. The Quantibody Mouse Inflammation Array Kit contains information of 40 cytokines**

| Name    | Average expression |           | Fold change | logFC    | P-value  | Adjust P-value |
|---------|--------------------|-----------|-------------|----------|----------|----------------|
|         | 3-HAA group        | HCC group |             |          |          |                |
| TIMP-1  | 12.75564           | 10.710364 | 4.12752     | 2.045275 | 1.43E-11 | 5.73E-10       |
| TNFa    | 4.377788           | 6.538326  | 0.223673    | -2.16054 | 7.33E-11 | 1.47E-09       |
| BLC     | 11.71714           | 9.799796  | 3.777275    | 1.917346 | 8.98E-07 | 1.20E-05       |
| GM-CSF  | 2.810518           | 4.086877  | 0.412836    | -1.27636 | 3.72E-05 | 0.000305109    |
| MCP-5   | 5.612818           | 4.620736  | 1.989053    | 0.992081 | 3.81E-05 | 0.000305109    |
| IL-5    | 5.363004           | 6.441348  | 0.473572    | -1.07834 | 0.000116 | 0.000775834    |
| RANTES  | 6.002099           | 4.510055  | 2.812873    | 1.492044 | 0.000259 | 0.001480086    |
| IL-6    | 7.206499           | 5.501432  | 3.260441    | 1.705067 | 0.000511 | 0.002553632    |
| Leptin  | 10.37657           | 9.113039  | 2.400821    | 1.263528 | 0.001701 | 0.007558416    |
| IL-2    | 3.152177           | 4.078661  | 0.526139    | -0.92648 | 0.00256  | 0.010056094    |
| MIG     | 9.073243           | 7.526394  | 2.921782    | 1.546848 | 0.002765 | 0.010056094    |
| TNF RII | 6.544429           | 7.504444  | 0.514052    | -0.96002 | 0.011813 | 0.039375828    |
| MCP-1   | 5.062386           | 6.435346  | 0.386098    | -1.37296 | 0.015084 | 0.046413391    |
| PF4     | 11.29392           | 11.895787 | 0.6589      | -0.60187 | 0.01782  | 0.050914471    |
| MCSF    | 3.313862           | 2.305273  | 2.011943    | 1.00859  | 0.021437 | 0.057164209    |
| IL-3    | 3.171101           | 2.189877  | 1.97414     | 0.981224 | 0.02646  | 0.066151083    |
| IL-21   | 7.125611           | 6.458344  | 1.588062    | 0.667267 | 0.032672 | 0.076875037    |
| MIP-1g  | 8.509542           | 8.723811  | 0.861983    | -0.21427 | 0.056067 | 0.124593099    |

| Name      | Average expression |           | Fold change | logFC    | P-value  | Adjust P-value |
|-----------|--------------------|-----------|-------------|----------|----------|----------------|
|           | 3-HAA group        | HCC group |             |          |          |                |
| Eotaxin-2 | 3.78015            | 3.143810  | 1.55438     | 0.63634  | 0.072737 | 0.148316922    |
| IL-4      | 2.607128           | 3.039943  | 0.740815    | -0.43282 | 0.080715 | 0.148316922    |
| IL-17     | 3.903029           | 3.142582  | 1.694015    | 0.760447 | 0.081574 | 0.148316922    |
| TARC      | 4.876337           | 4.293003  | 1.498308    | 0.583334 | 0.076627 | 0.148316922    |
| Eotaxin   | 6.139995           | 5.851608  | 1.221274    | 0.288387 | 0.08905  | 0.148416743    |
| KC        | 5.609233           | 5.038121  | 1.485668    | 0.571112 | 0.085922 | 0.148416743    |
| IL-12p70  | 4.566027           | 3.846635  | 1.646489    | 0.719393 | 0.109385 | 0.175015778    |
| IL-13     | 6.870799           | 6.282661  | 1.503306    | 0.588139 | 0.187424 | 0.288344496    |
| G-CSF     | 7.973006           | 8.645769  | 0.627304    | -0.67276 | 0.211464 | 0.313280535    |
| IL-1a     | 2.885475           | 2.655678  | 1.17267     | 0.229797 | 0.300054 | 0.428648632    |
| IL-7      | 8.934043           | 8.484258  | 1.365837    | 0.449785 | 0.341399 | 0.470895216    |
| IL-10     | 5.228037           | 5.511335  | 0.821711    | -0.2833  | 0.365852 | 0.487802505    |
| CD30L     | 2.459745           | 2.074961  | 1.305665    | 0.384785 | 0.40115  | 0.517612996    |
| Fas L     | 6.232679           | 5.596861  | 1.553818    | 0.635818 | 0.457481 | 0.570968336    |
| IL-1b     | 4.044307           | 4.401684  | 0.780583    | -0.35738 | 0.471049 | 0.570968336    |
| TCA-3     | 3.535392           | 3.689248  | 0.898845    | -0.15386 | 0.565541 | 0.665341843    |
| LIX       | 10.47742           | 10.176661 | 1.231789    | 0.300755 | 0.665115 | 0.739863335    |
| MIP-1a    | 2.936758           | 2.707100  | 1.172557    | 0.229658 | 0.665877 | 0.739863335    |
| IL-15     | 10.84046           | 11.229492 | 0.763641    | -0.38903 | 0.756719 | 0.818075035    |

| Name   | Average expression |           | Fold change | logFC    | P-value  | Adjust P-value |
|--------|--------------------|-----------|-------------|----------|----------|----------------|
|        | 3-HAA group        | HCC group |             |          |          |                |
| ICAM-1 | 9.81125            | 9.767351  | 1.030897    | 0.0439   | 0.782412 | 0.823591896    |
| IFNg   | 5.576423           | 5.536569  | 1.02801     | 0.039854 | 0.898118 | 0.921147128    |
| TNF RI | 7.087993           | 7.098878  | 0.992484    | -0.01088 | 0.937442 | 0.937442013    |
